# Supplementary material
Source: Springer Nature journal article supplement (https://www.springermedizin.de/resource/supplementary/12911_2009_304_MOESM16_ESM.pdf/9525492)
Supplement: MOESM16 [file 9525492]

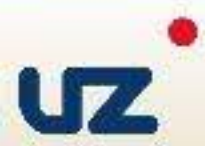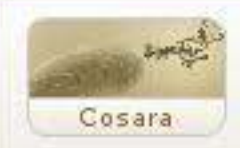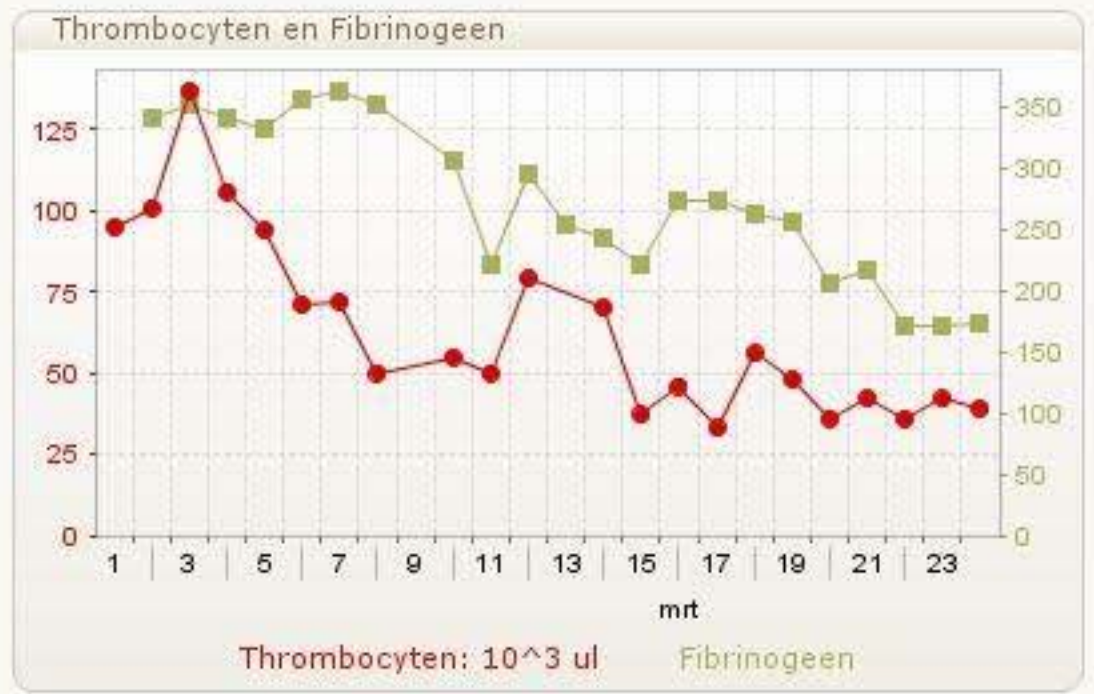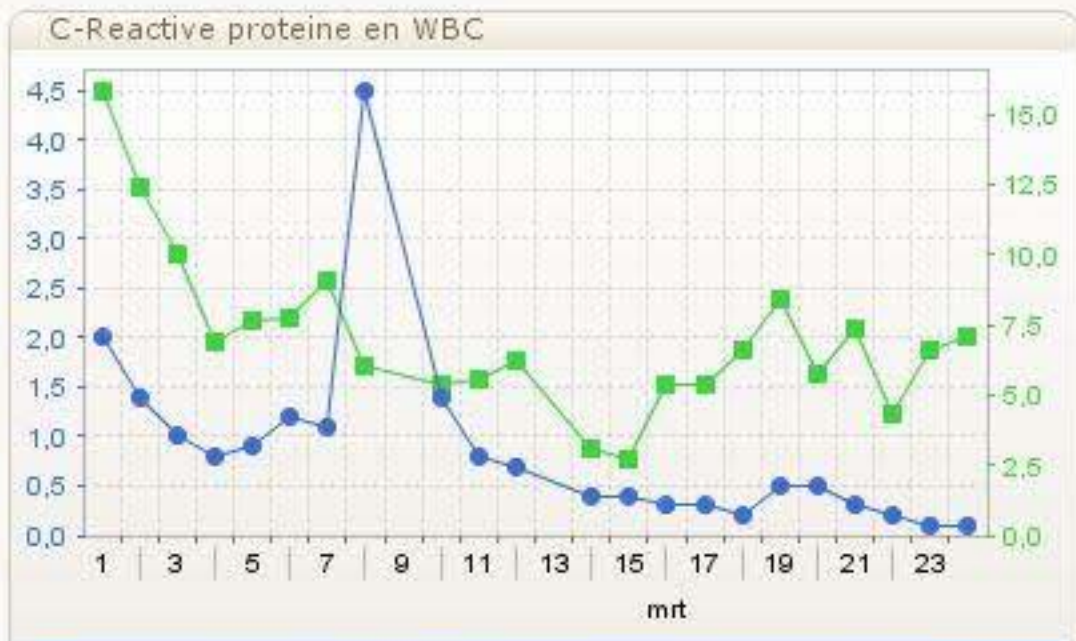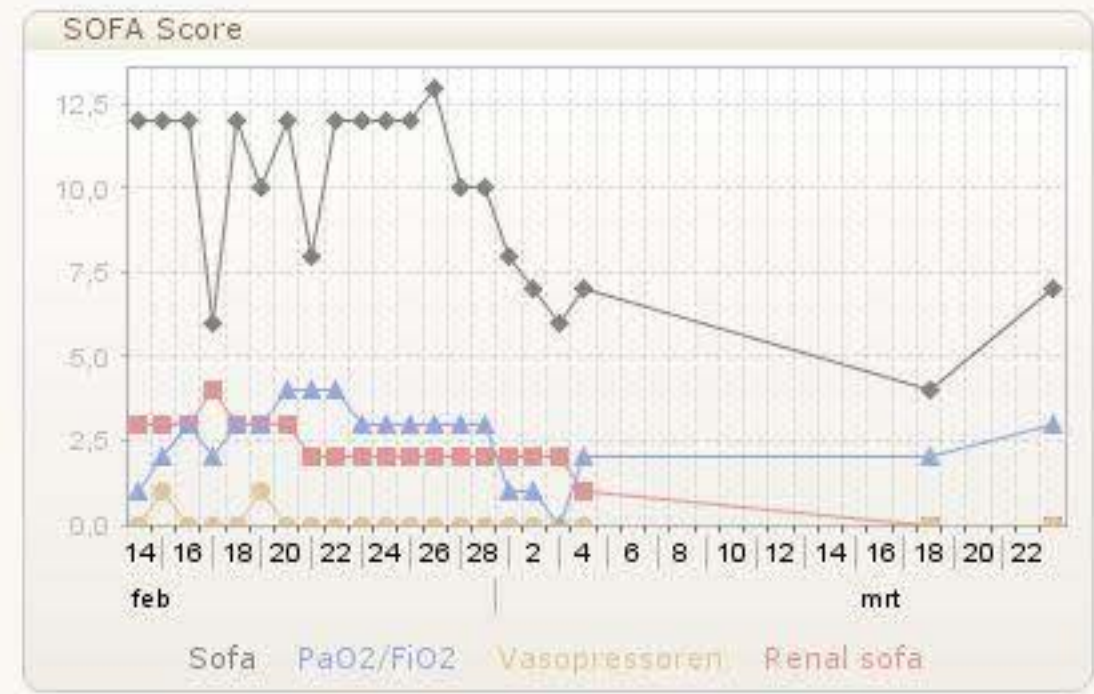

14 feb tot 25 mrt

### Sedation Protocol

**Patient information**

Sedation type:

Sex:

Weight of the patient:

Age of the patient:

Glazidim

Details

**Respiratoire infectie**

Vermoeden

NIET geregistreerd

### Intervenous drip

**i** Give the patient with ID 678546 an intervenous drip Dormicum en Morphine of 5.0 ml/hour!

### Current RASS

**?** Please insert the current RASS score of the patient with ID 678546!

**View Control**

1W  2W  3W  ALL

Basis  Uitgebreid
